# Supplementary material
Source: publisher figshare collection journal article supplement (https://karger.figshare.com/articles/dataset/_/5126524)
Supplement: Supplementary file 2 [file 1]

**Table S1**

| Primer/Probe | Order number  |
|--------------|---------------|
| Claudin-1    | Hs00221623_m1 |
| Claudin-3    | Hs00265816_s1 |
| Claudin-4    | Hs00533616_s1 |
| Claudin-5    | Hs00533949_s1 |
| Claudin-6    | Hs04189215_g1 |
| Claudin-7    | Hs00600772_m1 |
| Claudin-9    | Hs00253134_s1 |
| Claudin-12   | Hs01082669_m1 |
| Claudin-14   | Hs00273267_s1 |
| Claudin-16   | Hs01070692_m1 |
| Claudin-17   | Hs01043467_s1 |
| Occludin     | Hs00170162_m1 |

**Table S2**

| Primary antibody            | Host species | Source (catalog number)     | Dilution Western | Dilution ICC | Secondary antibody |
|-----------------------------|--------------|-----------------------------|------------------|--------------|--------------------|
| Anti-claudin-1              | Mouse        | Invitrogen (37-4900)        | 1 : 500          | 1 : 200      | Anti-mouse IgG     |
| Anti-claudin-3              | Rabbit       | Invitrogen (34-1700)        | 1 : 250          | 1 : 100      | Anti-rabbit IgG    |
| Anti-claudin-4              | Mouse        | Invitrogen (32-9400)        | 1 : 500          | 1 : 100      | Anti-mouse IgG     |
| Anti-claudin-7              | Rabbit       | Invitrogen (34-9100)        | 1 : 250          | 1 : 250      | Anti-rabbit IgG    |
| Anti-claudin-9              | Rabbit       | Abcam (ab37474)             | 1 : 500          | 1 : 200      | Anti-rabbit IgG    |
| Anti-claudin-14             | Goat         | Abcam (ab19035)             | 1 : 500          | 1 : 200      | Anti-goat IgG      |
| Anti-occludin               | Mouse        | Invitrogen (33-1500)        | 1 : 1000         | 1 : 200      | Anti-mouse IgG     |
| Anti-p-PKC $\zeta/\lambda$  | Rabbit       | Cell Signaling Tech. (9378) | 1 : 500          | -            | Anti-rabbit IgG    |
| Anti-PKC $\zeta$            | Rabbit       | Cell Signaling Tech. (9368) | 1 : 500          | -            | Anti-rabbit IgG    |
| Anti-p-GSK-3 $\alpha/\beta$ | Goat         | Santa Cruz (sc-11758)       | 1 : 100          | -            | Anti-goat IgG      |
| Anti-GSK-3 $\alpha/\beta$   | Mouse        | Santa Cruz (sc-56913)       | 1 : 500          | -            | Anti-mouse IgG     |
| Anti-p-PI3K p85/p55         | Rabbit       | Cell Signaling Tech. (4228) | 1 : 250          | -            | Anti-rabbit IgG    |
| Anti-PI3K p85               | Rabbit       | Cell Signaling Tech. (4292) | 1 : 1000         | -            | Anti-rabbit IgG    |
| Anti-filaggrin              | Rabbit       | Abcam (ab24584)             | 1 : 500          | -            | Anti-rabbit IgG    |
| Anti-involucrin             | Rabbit       | Santa Cruz (sc-28557)       | 1 : 250          | -            | Anti-rabbit IgG    |
| Anti-keratin 1              | Mouse        | Novus Biol. (NB100-2756)    | 1 : 500          | -            | Anti-mouse IgG     |
| Anti-keratin 10             | Mouse        | Novus Biol. (NBP1-97795)    | 1 : 100          | -            | Anti-mouse IgG     |
| Anti-TGM 1                  | Rabbit       | Novus Biol. (NB100-1844)    | 1 : 250          | -            | Anti-rabbit IgG    |

**Abbreviations:** ICC; immunocytochemistry, **TGM1**; transglutaminase 1
